# Supplementary material
Source: PubMed Central journal article supplement (PMC5576929)
Supplement: ASN.2016091022SupplementaryData.pdf [file ASN.2016091022SupplementaryData.pdf]

**SUPPLEMENTARY APPENDIX TO:**

**SAFETY OF RITUXIMAB COMPARED TO CYCLOPHOSPHAMIDE FOR IDIOPATHIC MEMBRANOUS NEPHROPATHY**

**Supplementary Table 1:**

Results of sensitivity analysis by low or high dose cyclophosphamide, and one or four doses of rituximab: baseline characteristics

| Characteristic                        | Low dose ST-CP (<20g)<br>(n=25) |              | High dose ST-CP (≥20g)<br>(n=78) |              | Single dose RTX<br>(n=70) |             | Four doses RTX<br>(n=30) |             | p      |
|---------------------------------------|---------------------------------|--------------|----------------------------------|--------------|---------------------------|-------------|--------------------------|-------------|--------|
| Male gender                           | 68%                             |              | 78%                              |              | 77%                       |             | 60%                      |             | 0.55   |
| Age (years)                           | 52.6                            | 16.8         | 56.2                             | 11.0         | 51.6                      | 15.2        | 51.4                     | 17.8        | 0.19   |
| BMI (kg/m <sup>2</sup> )              | 25.7                            | 3.7          | 26.9                             | 3.5          | 26.9                      | 4.0         | 25.8                     | 5.1         | 0.35   |
| Disease duration (months)             | 13.1                            | (3.5-35.4)   | 10.8                             | (5.0-21.4)   | 10.6                      | (4.5-29.4)  | 16.2                     | (6.0-34.8)  | 0.54   |
| Systolic blood pressure (mmHg)        | 135                             | (120-146)    | 130                              | (120-150)    | 131                       | (122-145)   | 132                      | (123-140)   | 0.81   |
| Diastolic blood pressure (mmHg)       | 84                              | (70-90)      | 78                               | (70-84)      | 82                        | (74-90)     | 81                       | (76-89)     | 0.08   |
| Urine protein creatinine ratio (mg/g) | 10200                           | (5967-13734) | 8620                             | (5649-11050) | 6541                      | (4011-9800) | 5740                     | (4411-7443) | <0.001 |
| eGFR (ml/min per 1.73m <sup>2</sup> ) | 62.3                            | 25.6         | 57.2                             | 21.9         | 59.6                      | 27.2        | 57.8                     | 25.5        | 0.81   |
| Serum creatinine (μmol/l)             | 109                             | (86-132)     | 114                              | (93-142)     | 107                       | (86-151)    | 106                      | (82-141)    | 0.80   |
| Serum albumin (g/l)                   | 20.9                            | 7.9          | 21.8                             | 6.1          | 21.8                      | 7.2         | 23.5                     | 5.7         | 0.53   |
| Serum cholesterol (mmol/l)            | 8.0                             | 2.7          | 7.6                              | 2.6          | 6.9                       | 1.8         | 7.0                      | 1.7         | 0.08   |
| ACEi/ARB use                          | 80%                             |              | 91%                              |              | 93%                       |             | 97%                      |             | 0.16   |
| Diuretic use                          | 64%                             |              | 87%                              |              | 61%                       |             | 80%                      |             | 0.02   |
| Statin use                            | 52%                             |              | 65%                              |              | 81%                       |             | 57%                      |             | 0.07   |
| Prior immunosuppressive therapy       | 12%                             |              | 12%                              |              | 39%                       |             | 17%                      |             | <0.001 |

Data are presented as proportions (%), means and standard deviations or median and inter quartile range, respectively. The groups were compared using  $\chi^2$  test for proportions and one-way ANOVA (F-test) for continuous variables. SBP: systolic blood pressure. DPB: diastolic blood pressure. UPCR: urine protein creatinine ratio. eGFR: estimated glomerular filtration rate based on the abbreviated Modification of Diet in Renal Disease (MDRD) equation for mass spectrometry calibrated serum creatinine values. ACEi: angiotensin converting enzyme inhibitors. ARB: angiotensin II receptor blockers.

## Supplementary Table 2:

Result of sensitivity analysis by low or high dose cyclophosphamide, and one or four doses of rituximab: adverse event rates and renal outcome.

| Outcome                   | Low dose ST-CP<br>(<20g) | High dose ST-CP (>20g) |             | RTX (1 dose) |             | RTX (4 doses) |             |
|---------------------------|--------------------------|------------------------|-------------|--------------|-------------|---------------|-------------|
| <i>Crude</i>              | HR                       | HR                     | 95% CI      | HR           | 95% CI      | HR            | 95% CI      |
| First adverse event       | 1 (ref)                  | 0.97                   | 0.55 - 1.69 | 0.23         | 0.12 - 0.48 | 0.28          | 0.13 - 0.63 |
| Serious adverse event     | 1 (ref)                  | 0.70                   | 0.32 - 1.54 | 0.25         | 0.08 - 0.76 | 0.28          | 0.09 - 0.93 |
| Non-serious adverse event | 1 (ref)                  | 1.00                   | 0.56 - 1.77 | 0.21         | 0.10 - 0.46 | 0.26          | 0.11 - 0.64 |
| partial remission         | 1 (ref)                  | 0.88                   | 0.55 - 1.42 | 0.51         | 0.30 - 0.85 | 0.86          | 0.49 - 1.52 |
| Complete remission        | 1 (ref)                  | 1.39                   | 0.64 - 3.03 | 1.10         | 0.46 - 2.65 | 1.35          | 0.56 - 3.26 |
| Renal failure             | 1 (ref)                  | 0.84                   | 0.33 - 2.16 | 0.99         | 0.33 - 2.94 | 0.69          | 0.22 - 2.16 |
| <i>Adjusted</i>           |                          |                        |             |              |             |               |             |
| First adverse event       | 1 (ref)                  | 0.83                   | 0.46 - 1.49 | 0.21         | 0.10 - 0.45 | 0.25          | 0.11 - 0.59 |
| Serious adverse event     | 1 (ref)                  | 0.70                   | 0.32 - 1.54 | 0.25         | 0.08 - 0.77 | 0.28          | 0.09 - 0.92 |
| Non-serious adverse event | 1 (ref)                  | 0.85                   | 0.47 - 1.54 | 0.20         | 0.09 - 0.46 | 0.23          | 0.09 - 0.58 |
| Partial remission         | 1 (ref)                  | 0.89                   | 0.54 - 1.46 | 0.51         | 0.30 - 0.88 | 0.76          | 0.42 - 1.40 |
| Complete remission        | 1 (ref)                  | 1.82                   | 0.81 - 4.12 | 1.14         | 0.45 - 2.88 | 1.48          | 0.57 - 3.84 |
| Renal failure             | 1 (ref)                  | 0.91                   | 0.33 - 2.53 | 1.12         | 0.34 - 3.62 | 0.85          | 0.24 - 3.00 |

HR: Hazard ratio, 95%CI: 95% confidence interval. Analyses were adjusted for the following covariates: **First adverse event:** sex, age, disease duration, urine protein creatinine ratio (UPCR), estimated GFR (by MDRD4 equation), cholesterol, ACEi/ARB, diuretics, prior immunosuppressive therapy. **Serious adverse event:** age, disease duration, prior therapy. **Non-serious adverse event:** sex, age, disease duration, UPCR, estimated GFR, cholesterol, prior immunosuppressive therapy. **Renal failure:** sex, age, disease duration, UPCR, estimated GFR. **Partial remission:** sex, age, disease duration, UPCR, estimated GFR, prior therapy. **Complete remission:** sex, age, disease duration, UPCR, estimated GFR, prior therapy.

**Supplementary Table 3:**

Results of sensitivity analysis: restriction to patient without prior immunosuppression.

| Outcome                   | Hazard Ratio | 95% Confidence Interval |
|---------------------------|--------------|-------------------------|
| <i>Crude</i>              |              |                         |
| First adverse event       | 0.27         | 0.16 - 0.45             |
| Serious adverse event     | 0.31         | 0.13 - 0.75             |
| Non-serious adverse event | 0.26         | 0.15 - 0.47             |
| Partial remission         | 0.72         | 0.50 - 1.04             |
| Complete remission        | 0.97         | 0.55 - 1.72             |
| Renal failure             | 0.72         | 0.31 - 1.68             |
| <i>Adjusted</i>           |              |                         |
| First adverse event       | 0.21         | 0.12 - 0.37             |
| Serious adverse event     | 0.31         | 0.13 - 0.75             |
| Non-serious adverse event | 0.23         | 0.12 - 0.42             |
| Partial remission         | 0.66         | 0.46 - 0.97             |
| Complete remission        | 0.74         | 0.40 - 1.37             |
| Renal failure             | 0.83         | 0.34 - 2.03             |

Analyses were adjusted for the following covariates: **First adverse event:** sex, age, disease duration, urine protein creatinine ratio (UPCR), estimated GFR (by MDRD4 equation), cholesterol, ACEi/ARB, diuretics. **Serious adverse event:** age, disease duration. **Non-serious adverse event:** sex, age, disease duration, UPCR, estimated GFR, cholesterol. **Renal failure:** sex, age, disease duration, UPCR, estimated GFR. **Partial remission:** sex, age, disease duration, UPCR, estimated GFR. **Complete remission:** sex, age, disease duration, UPCR, estimated GFR.

**Supplemental Table 4.**

Definitions of adverse events observed throughout the study period in patients with idiopathic membranous nephropathy and persistent nephrotic syndrome refractory to conservative therapy treated with Rituximab (n=100) or a Cyclophosphamide-based immunosuppressive regimen (n=103).

| <b>Adverse event</b>                   | <b>Definition</b>                                                                                                                                                                    |
|----------------------------------------|--------------------------------------------------------------------------------------------------------------------------------------------------------------------------------------|
| Leucopenia                             | White blood cell count $< 3.0 \times 10^9/l$ ( $=3000/mm^3$ )                                                                                                                        |
| Thrombocytopenia                       | Platelet count $< 50 \times 10^9/l$ ( $=50000/mm^3$ )                                                                                                                                |
| Hemorrhagic cystitis                   | Non-glomerular macrohematuria confirmed by cystoscopy or necessitating withdrawal of therapy                                                                                         |
| Infertility                            | The inability to conceive without medical intervention such as intra uterine insemination or <i>in vitro</i> fertilization                                                           |
| Alopecia                               | Hair loss not attributed to normal ageing                                                                                                                                            |
| Infection                              | Any infection or unexplained fever requiring hospital admission, use of antibiotic treatment or the interruption of therapy                                                          |
| Malignancy                             | Malignant neoplastic disease including lymphoproliferative diseases and leukaemia                                                                                                    |
| Minor cardiovascular event             | Stable angina pectoris, peripheral vascular disease, transient ischemic attack (without residual disability)                                                                         |
| Major cardiovascular event             | Acute myocardial infarction, stroke, unstable angina pectoris, artery revascularization, amputations, pulmonary embolism and/or deep venous thrombosis                               |
| Liver toxicity                         | SGTP $> 90$ U/l, SGOT $> 80$ U/l                                                                                                                                                     |
| Hyperglycemia                          | Initiation of glucose regulating medication (e.g. insulin, metformin) or dosage increase if pre-existing diabetes mellitus.                                                          |
| Osteonecrosis / pathological fractures | A-vascular necrosis, pathological fractures associated with prednisone use                                                                                                           |
| Infusion reaction                      | Adverse reaction (e.g. fever, chills, flushing, itching, rash, altered heart rate and blood pressure, dyspnea, abdominal pain, nausea or diarrhea) following infusion of medication. |

SGTP: Serum glutamic pyruvic transaminase, SGOT: Serum glutamic oxaloacetic transaminase,

## Supplementary Table 5.

STROBE Statement—Checklist of items that should be included in reports of *cohort studies*.

| Item No Recommendation       |    |                                                                                                                                                                                                                                                                                                                                                   |
|------------------------------|----|---------------------------------------------------------------------------------------------------------------------------------------------------------------------------------------------------------------------------------------------------------------------------------------------------------------------------------------------------|
| <b>Title and abstract</b>    | 1  | <p>(a) Indicate the study's design with a commonly used term in the title or the abstract</p> <p><i>see Abstract, page 2 – line 8</i></p> <hr/> <p>(b) Provide in the abstract an informative and balanced summary of what was done and what was found</p> <p><i>see Abstract, page 2</i></p>                                                     |
| <b>Introduction</b>          |    |                                                                                                                                                                                                                                                                                                                                                   |
| Background/rationale         | 2  | <p>Explain the scientific background and rationale for the investigation being reported</p> <p><i>see page 3, lines 7 to 14</i></p>                                                                                                                                                                                                               |
| Objectives                   | 3  | <p>State specific objectives, including any prespecified hypotheses</p> <p><i>see page 3, lines 18 and 19.</i></p>                                                                                                                                                                                                                                |
| <b>Methods</b>               |    |                                                                                                                                                                                                                                                                                                                                                   |
| Study design                 | 4  | <p>Present key elements of study design early in the paper</p> <p><i>see pages 11 to 13,</i></p>                                                                                                                                                                                                                                                  |
| Setting                      | 5  | <p>Describe the setting, locations, and relevant dates, including periods of recruitment, exposure, follow-up, and data collection</p> <p><i>see page 11</i></p>                                                                                                                                                                                  |
| Participants                 | 6  | <p>(a) Give the eligibility criteria, and the sources and methods of selection of participants. Describe methods of follow-up</p> <p><i>see page 11 lines 4 to 8, and 13 to 19</i></p> <hr/> <p>(b) For matched studies, give matching criteria and number of exposed and unexposed</p> <p><i>(not applicable)</i></p>                            |
| Variables                    | 7  | <p>Clearly define all outcomes, exposures, predictors, potential confounders, and effect modifiers. Give diagnostic criteria, if applicable</p> <p><i>Outcomes: page 12 (section Outcomes and definitions)</i></p> <p><i>Exposures: page 11 (section Patients and treatments)</i></p> <p><i>Potential confounders: page 12 lines 18 to 23</i></p> |
| Data sources/<br>measurement | 8* | <p>For each variable of interest, give sources of data and details of methods of assessment (measurement). Describe comparability of assessment methods if there is more than one group</p>                                                                                                                                                       |

*see page 12, outcomes and definitions*

|                        |     |                                                                                                                                                                                                                                              |
|------------------------|-----|----------------------------------------------------------------------------------------------------------------------------------------------------------------------------------------------------------------------------------------------|
| Bias                   | 9   | Describe any efforts to address potential sources of bias<br><br><i>see page 13, (statistical methods).</i>                                                                                                                                  |
| Study size             | 10  | Explain how the study size was arrived at<br><br><i>see page 4 lines 4 to 13.</i>                                                                                                                                                            |
| Quantitative variables | 11  | Explain how quantitative variables were handled in the analyses. If applicable, describe which groupings were chosen and why<br><br><i>see statistical methods page 13</i>                                                                   |
| Statistical methods    | 12  | (a) Describe all statistical methods, including those used to control for confounding<br><br><i>see statistical methods page 13</i>                                                                                                          |
|                        |     | (b) Describe any methods used to examine subgroups and interactions<br><br><b>n/a</b>                                                                                                                                                        |
|                        |     | (c) Explain how missing data were addressed<br><br><b>n/a</b>                                                                                                                                                                                |
|                        |     | (d) If applicable, explain how loss to follow-up was addressed<br><br><b>See statistical methods</b>                                                                                                                                         |
|                        |     | (e) Describe any sensitivity analyses<br><br><i>see statistical methods</i>                                                                                                                                                                  |
| <b>Results</b>         |     |                                                                                                                                                                                                                                              |
| Participants           | 13* | (a) Report numbers of individuals at each stage of study—eg numbers potentially eligible, examined for eligibility, confirmed eligible, included in the study, completing follow-up, and analysed<br><br><i>see page 4 Patient inclusion</i> |
|                        |     | (b) Give reasons for non-participation at each stage<br><br><i>see page 4 Patient inclusion</i>                                                                                                                                              |
|                        |     | (c) Consider use of a flow diagram<br><br><i>Flow diagrams can be found in earlier descriptions of both cohorts that are referenced in the paper (references 6 and 11)</i>                                                                   |
| Descriptive data       | 14* | (a) Give characteristics of study participants (eg demographic, clinical, social) and information on exposures and potential confounders<br><br><i>see Table 1</i>                                                                           |

(b) Indicate number of participants with missing data for each variable of interest

(c) Summarise follow-up time (eg, average and total amount)

*see page 4, line 20*

|                          |     |                                                                                                                                                                                                                                                                                                                                                                                                                                                                                      |
|--------------------------|-----|--------------------------------------------------------------------------------------------------------------------------------------------------------------------------------------------------------------------------------------------------------------------------------------------------------------------------------------------------------------------------------------------------------------------------------------------------------------------------------------|
| Outcome data             | 15* | Report numbers of outcome events or summary measures over time<br><br><i>see page 4, lines 24 to 26 and Figure 1.</i>                                                                                                                                                                                                                                                                                                                                                                |
| Main results             | 16  | (a) Give unadjusted estimates and, if applicable, confounder-adjusted estimates and their precision (eg, 95% confidence interval). Make clear which confounders were adjusted for and why they were included<br><br><i>See Figure 1</i><br><br>(b) Report category boundaries when continuous variables were categorized<br><br><i>n/a</i><br><br>(c) If relevant, consider translating estimates of relative risk into absolute risk for a meaningful time period<br><br><i>n/a</i> |
| Other analyses           | 17  | Report other analyses done—eg analyses of subgroups and interactions, and sensitivity analyses<br><br><i>See page 6 lines 2 and 5, page 6 lines 23 and 25</i>                                                                                                                                                                                                                                                                                                                        |
| <b>Discussion</b>        |     |                                                                                                                                                                                                                                                                                                                                                                                                                                                                                      |
| Key results              | 18  | Summarise key results with reference to study objectives<br><br><i>See page 7, lines 3 to 16</i>                                                                                                                                                                                                                                                                                                                                                                                     |
| Limitations              | 19  | Discuss limitations of the study, taking into account sources of potential bias or imprecision. Discuss both direction and magnitude of any potential bias<br><br><i>See page 9 (limitations and strengths)</i>                                                                                                                                                                                                                                                                      |
| Interpretation           | 20  | Give a cautious overall interpretation of results considering objectives, limitations, multiplicity of analyses, results from similar studies, and other relevant evidence<br><br><i>See page 7 line 19 to page 9 line 17.</i>                                                                                                                                                                                                                                                       |
| Generalisability         | 21  | Discuss the generalisability (external validity) of the study results<br><br><i>See page 10 lines 7 to 13</i>                                                                                                                                                                                                                                                                                                                                                                        |
| <b>Other information</b> |     |                                                                                                                                                                                                                                                                                                                                                                                                                                                                                      |
| Funding                  | 22  | Give the source of funding and the role of the funders for the present study and, if applicable, for the original study on which the present article is based<br><br><i>See acknowledgements</i>                                                                                                                                                                                                                                                                                     |
